# Supplementary material for: High UV shielding and mechanical properties of shellac composite film for fruit packaging
Source: Royal Society of Chemistry journal article supplement (doi:10.1039/d3nj05314h), 2024-01-01
Supplement: d3nj05314h1.pdf [file d3nj05314h1.pdf]

## Supporting Information

### **High UV shielding and mechanical properties of shellac composite film for fruit packaging**

*Lingsu Zhang*<sup>1,2</sup>, *Deyan Du*<sup>1,2</sup>, *Weifu Dong*<sup>1,2</sup>, *Tatsuo Kaneko*<sup>1,2</sup>, *Hongji Zhang*<sup>1,2</sup>,  
*Mingqing Chen*<sup>1,2</sup>, *Dongjian Shi*<sup>1,2\*</sup>

<sup>1</sup> The Key Laboratory of Synthetic and Biological Colloids, Ministry of Education, School of Chemical and Material Engineering, Jiangnan University, Wuxi, Jiangsu 214122, China.

<sup>2</sup> International Research Center for Photo-responsive Molecules and Materials, Jiangnan University, 214122 Wuxi, Jiangsu, China.

#### **Supplementary Information mainly shows the following contents.**

1. Abbreviation and corresponding component ratio of shellac composite films (**Table S1**)
2. Digital photos of laser irradiation of SA<sub>m</sub>PS solutions (**Figure S1**)
3. FTIR spectra of SA<sub>m</sub>PS films (**Figure S2**)
4. Digital photos of laser irradiation of SA<sub>m</sub>C<sub>x</sub>PS composite solutions (**Figure S3**)
5. FTIR spectra of SA<sub>m</sub>C<sub>x</sub>PS composite films (**Figure S4**)

**Table S1.** Abbreviation and corresponding component ratios of shellac composite films.

| Samples                                | Shellac<br>(wt%) | NH <sub>3</sub> ·H <sub>2</sub> O<br>(M) | CNF<br>(wt%) | PEG<br>(wt%) | sodium oleate<br>(wt%) |
|----------------------------------------|------------------|------------------------------------------|--------------|--------------|------------------------|
| A <sub>1.2</sub> S                     | 10               | 1.2                                      | 0            | 0            | 0                      |
| A <sub>6.0</sub> S                     | 10               | 6.0                                      | 0            | 0            | 0                      |
| A <sub>12.0</sub> S                    | 10               | 12.0                                     | 0            | 0            | 0                      |
| SA <sub>1.2</sub> PS                   | 10               | 1.2                                      | 0            | 2            | 0.4                    |
| SA <sub>6.0</sub> PS                   | 10               | 6.0                                      | 0            | 2            | 0.4                    |
| SA <sub>12.0</sub> PS                  | 10               | 12.0                                     | 0            | 2            | 0.4                    |
| SA <sub>12.0</sub> C <sub>0.5</sub> PS | 10               | 12.0                                     | 0.5          | 2            | 0.4                    |
| SA <sub>12.0</sub> C <sub>0.7</sub> PS | 10               | 12.0                                     | 0.7          | 2            | 0.4                    |
| SA <sub>12.0</sub> C <sub>0.9</sub> PS | 10               | 12.0                                     | 0.9          | 2            | 0.4                    |

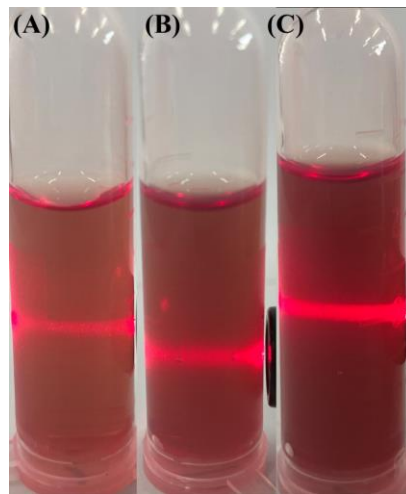

**Figure S1.** Digital photos of (A) SA<sub>1.2</sub>PS, (B) SA<sub>6.0</sub>PS and (C) SA<sub>12.0</sub>PS solutions with laser irradiation.

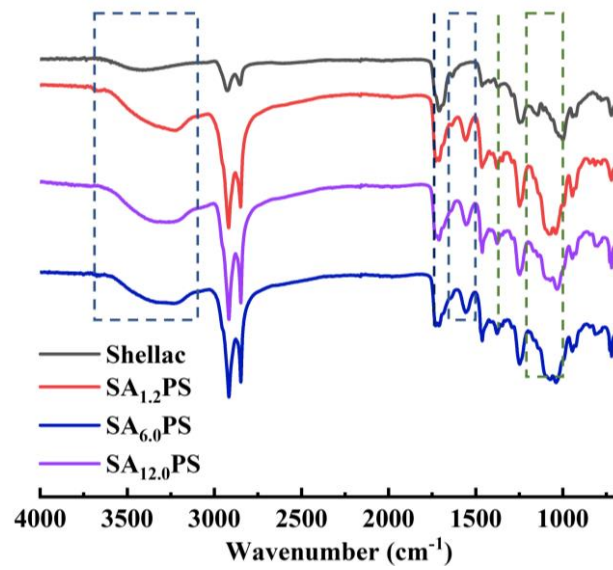

**Figure S2.** FTIR spectra of SA<sub>m</sub>PS films.

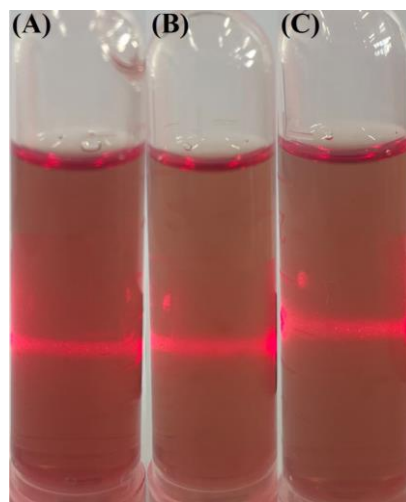

**Figure S3.** Digital photos of (A) SA<sub>12.0</sub>C<sub>0.5</sub>PS, (B) SA<sub>12.0</sub>C<sub>0.7</sub>PS and (C) SA<sub>12.0</sub>C<sub>0.9</sub>PS solutions with laser irradiation.

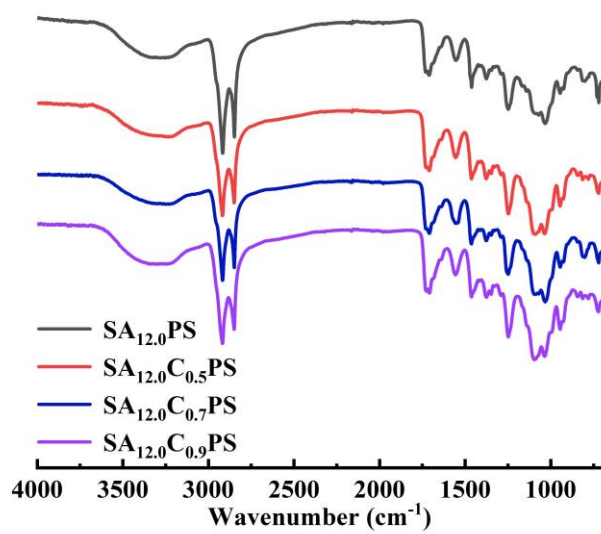

**Figure S4.** FTIR spectra of SA<sub>m</sub>C<sub>x</sub>PS composite films.
